# Supplementary material for: Density Distribution Maps: A Novel Tool for Subcellular Distribution Analysis and Quantitative Biomedical Imaging
Source: PubMed Central journal article supplement (PMC7867329; doi:10.3390/s21031009), 2021-02-02
Supplement: sensors-21-01009-s001.pdf [file sensors-21-01009-s001.pdf]

*Supplementary Materials*

# Density distribution maps: a novel tool for subcellular distribution analysis and quantitative biomedical imaging

Ilaria De Santis <sup>1,2</sup>, Michele Zanoni <sup>3</sup>, Chiara Arienti <sup>3</sup>, Alessandro Bevilacqua <sup>4,5,\*</sup>, Anna Tesei <sup>3</sup>

<sup>1</sup> Department of Medical and Surgical Sciences (DIMEC), Alma Mater Studiorum, University of Bologna, I-40138 Bologna, Italy; i.desantis@unibo.it

<sup>2</sup> Interdepartmental Centre Alma Mater Research Institute on Global Challenges and Climate Change (Alma Climate), University of Bologna, I-40126 Bologna, Italy

<sup>3</sup> Biosciences Laboratory, IRCCS Istituto Scientifico Romagnolo per lo Studio e la Cura dei Tumori (IRST) “Dino Amadori”, I-47014 Meldola, Italy; michele.zanoni@irst.emr.it (M.Z.); chiara.arianti@irst.emr.it (C.A.); anna.tesei@irst.emr.it (A.T.)

<sup>4</sup> Advanced Research Center on Electronic Systems (ARCES) for Information and Communication Technologies “E. De Castro”, University of Bologna, I-40125 Bologna, Italy

<sup>5</sup> Department of Computer Science and Engineering (DISI), University of Bologna, I-40136 Bologna, Italy

\* Correspondence: alessandro.bevilacqua@unibo.it; Tel.: +39-051-20-9-5409

**Table 1.** Median MTs intensity in MG-63 cells.

| Optical section | Median intensity $\pm$ MAD |                                   |
|-----------------|----------------------------|-----------------------------------|
|                 | CTR (n=17)                 | PTX-Ce6@-ker <sub>ag</sub> (n=14) |
| 1               | 24.0 $\pm$ 5.00            | 782 $\pm$ 197                     |
| 2               | 36.0 $\pm$ 8.00            | 918 $\pm$ 233                     |
| 3               | 53.0 $\pm$ 11.0            | 991 $\pm$ 250                     |
| 4               | 76.0 $\pm$ 17.0            | 920 $\pm$ 236                     |
| 5               | 123 $\pm$ 27.0             | 781 $\pm$ 193                     |
| 6               | 210 $\pm$ 46.0             | 683 $\pm$ 163                     |
| 7               | 347 $\pm$ 76.0             | 752 $\pm$ 195                     |
| 8               | 460 $\pm$ 105              | 717 $\pm$ 180                     |
| 9               | 525 $\pm$ 128              | 828 $\pm$ 216                     |
| 10              | 563 $\pm$ 143              | 857 $\pm$ 236                     |
| 11              | 555 $\pm$ 148              | 862 $\pm$ 237                     |
| 12              | 553 $\pm$ 147              | 789 $\pm$ 214                     |
| 13              | 524 $\pm$ 141              | 726 $\pm$ 198                     |
| 14              | 460 $\pm$ 124              | 663 $\pm$ 181                     |
| 15              | 377 $\pm$ 103              | -                                 |
| 16              | 277 $\pm$ 72.0             | -                                 |
| 17              | 199 $\pm$ 50.0             | -                                 |

**Table 2.** Statistical analysis of MTs LDI percentage in MG-63 cells.

| LDI | Median percentage (%) $\pm$ MAD |                                   |                   |
|-----|---------------------------------|-----------------------------------|-------------------|
|     | CTR (n=17)                      | PTX-Ce6@-ker <sub>ag</sub> (n=14) | p-value (<0.05)   |
| 0   | 1.40 $\pm$ 0.96                 | 0.05 $\pm$ 0.01                   | <10 <sup>-5</sup> |
| 1   | 2.15 $\pm$ 1.26                 | 0.10 $\pm$ 0.02                   | <10 <sup>-5</sup> |
| 2   | 3.01 $\pm$ 1.53                 | 0.31 $\pm$ 0.03                   | <10 <sup>-5</sup> |
| 3   | 4.54 $\pm$ 1.87                 | 0.96 $\pm$ 0.06                   | <10 <sup>-5</sup> |
| 4   | 5.94 $\pm$ 1.05                 | 3.13 $\pm$ 0.16                   | <10 <sup>-5</sup> |
| 5   | 8.15 $\pm$ 1.08                 | 5.88 $\pm$ 0.38                   | <10 <sup>-3</sup> |
| 6   | 9.27 $\pm$ 0.79                 | 4.07 $\pm$ 0.16                   | <10 <sup>-5</sup> |
| 7   | 12.4 $\pm$ 0.79                 | 5.84 $\pm$ 0.33                   | <10 <sup>-3</sup> |
| 8   | 47.1 $\pm$ 14.2                 | 79.5 $\pm$ 0.84                   | <10 <sup>-5</sup> |

**Table 3.** Statistical analysis of hybrids LDI percentage in A549 sh/p53 cells.

| LDI | Nucleus                         |                 |                        | Cytoplasm                       |                 |                        |
|-----|---------------------------------|-----------------|------------------------|---------------------------------|-----------------|------------------------|
|     | Median percentage (%) $\pm$ MAD |                 |                        | Median percentage (%) $\pm$ MAD |                 |                        |
|     | CTR<br>(n=14)                   | 2 Gy<br>(n=14)  | p-value<br>( $<0.05$ ) | CTR<br>(n=14)                   | 2 Gy<br>(n=14)  | p-value<br>( $<0.05$ ) |
| 0   | 0.32 $\pm$ 0.13                 | 1.63 $\pm$ 0.97 | $<10^{-4}$             | 0.44 $\pm$ 0.12                 | 1.86 $\pm$ 0.60 | $<10^{-5}$             |
| 1   | 0.88 $\pm$ 0.26                 | 2.39 $\pm$ 1.65 | $<10^{-3}$             | 0.95 $\pm$ 0.28                 | 3.02 $\pm$ 0.87 | $<10^{-5}$             |
| 2   | 1.81 $\pm$ 0.42                 | 3.84 $\pm$ 1.74 | $<10^{-2}$             | 2.89 $\pm$ 0.40                 | 4.79 $\pm$ 0.93 | $<10^{-5}$             |
| 3   | 4.24 $\pm$ 0.73                 | 6.07 $\pm$ 2.45 | 0.02                   | 7.85 $\pm$ 0.98                 | 9.06 $\pm$ 1.29 | 0.05                   |
| 4   | 7.50 $\pm$ 1.11                 | 10.0 $\pm$ 3.01 | 0.08                   | 13.4 $\pm$ 1.17                 | 12.1 $\pm$ 1.42 | 0.07                   |
| 5   | 9.91 $\pm$ 1.05                 | 11.5 $\pm$ 1.83 | 0.05                   | 14.9 $\pm$ 0.89                 | 13.4 $\pm$ 0.95 | $<10^{-2}$             |
| 6   | 10.6 $\pm$ 1.03                 | 11.0 $\pm$ 1.37 | 0.30                   | 12.2 $\pm$ 0.38                 | 12.6 $\pm$ 1.03 | 0.73                   |
| 7   | 13.6 $\pm$ 1.02                 | 13.1 $\pm$ 1.71 | 0.80                   | 15.0 $\pm$ 0.38                 | 14.2 $\pm$ 0.99 | $<10^{-2}$             |
| 8   | 51.1 $\pm$ 5.05                 | 41.3 $\pm$ 12.7 | 0.01                   | 32.0 $\pm$ 3.14                 | 28.0 $\pm$ 6.29 | 0.07                   |

**Table 4.** Median hybrids LDI percentage and blobs number in HeLa cells.

| LDI | Median percentage (%) $\pm$ MAD |                   |                       |                    | (Median blob number (pixel <sup>-1</sup> ) $\pm$ MAD) *10 <sup>-3</sup> |                   |                       |                    |
|-----|---------------------------------|-------------------|-----------------------|--------------------|-------------------------------------------------------------------------|-------------------|-----------------------|--------------------|
|     | CTR<br>(n=5)                    | Cortical<br>(n=4) | Intermediate<br>(n=3) | Scattered<br>(n=3) | CTR<br>(n=5)                                                            | Cortical<br>(n=4) | Intermediate<br>(n=3) | Scattered<br>(n=3) |
| 0   | 0.06 $\pm$ 0.03                 | 0.20 $\pm$ 0.03   | 0.15 $\pm$ 0.01       | 0.16 $\pm$ 0.04    | 0.11 $\pm$ 0.05                                                         | 0.44 $\pm$ 0.07   | 0.32 $\pm$ 0.01       | 0.36 $\pm$ 0.08    |
| 1   | 0.30 $\pm$ 0.04                 | 0.51 $\pm$ 0.03   | 0.49 $\pm$ 0.02       | 0.48 $\pm$ 0.01    | 0.38 $\pm$ 0.01                                                         | 0.76 $\pm$ 0.04   | 0.67 $\pm$ 0.05       | 0.67 $\pm$ 0.14    |
| 2   | 0.58 $\pm$ 0.10                 | 1.27 $\pm$ 0.11   | 1.18 $\pm$ 0.05       | 1.25 $\pm$ 0.05    | 0.85 $\pm$ 0.20                                                         | 2.43 $\pm$ 0.24   | 1.99 $\pm$ 0.13       | 2.15 $\pm$ 0.05    |
| 3   | 2.62 $\pm$ 0.14                 | 4.21 $\pm$ 0.17   | 4.50 $\pm$ 0.56       | 5.01 $\pm$ 0.29    | 4.57 $\pm$ 0.55                                                         | 8.12 $\pm$ 0.07   | 8.75 $\pm$ 0.20       | 10.10 $\pm$ 0.12   |
| 4   | 10.30 $\pm$ 0.78                | 10.30 $\pm$ 0.75  | 11.70 $\pm$ 0.78      | 12.40 $\pm$ 0.57   | 17.6 $\pm$ 1.54                                                         | 19.60 $\pm$ 1.34  | 21.00 $\pm$ 0.88      | 23.80 $\pm$ 0.38   |
| 5   | 12.50 $\pm$ 1.02                | 14.10 $\pm$ 0.32  | 15.30 $\pm$ 1.12      | 15.64 $\pm$ 0.44   | 18.00 $\pm$ 1.46                                                        | 20.90 $\pm$ 0.51  | 22.50 $\pm$ 0.52      | 25.00 $\pm$ 0.08   |
| 6   | 7.26 $\pm$ 0.16                 | 9.12 $\pm$ 0.25   | 9.24 $\pm$ 0.07       | 9.51 $\pm$ 0.26    | 10.70 $\pm$ 0.77                                                        | 15.80 $\pm$ 0.09  | 16.20 $\pm$ 0.76      | 16.90 $\pm$ 0.13   |
| 7   | 13.20 $\pm$ 0.58                | 12.60 $\pm$ 0.32  | 13.50 $\pm$ 0.56      | 14.28 $\pm$ 0.14   | 19.50 $\pm$ 1.99                                                        | 21.40 $\pm$ 0.49  | 22.30 $\pm$ 0.96      | 24.50 $\pm$ 0.41   |
| 8   | 53.00 $\pm$ 2.99                | 48.3 $\pm$ 1.05   | 40.00 $\pm$ 4.11      | 41.68 $\pm$ 1.70   | 2.63 $\pm$ 0.10                                                         | 2.54 $\pm$ 0.08   | 3.79 $\pm$ 0.36       | 3.71 $\pm$ 0.44    |

**Table 5.** Statistical analysis of hybrids LDI percentage and blob number in HeLa cells.

| LDI | p-value ( $<0.05$ ) |                  |                      |                   |                                    |                  |                      |                   |
|-----|---------------------|------------------|----------------------|-------------------|------------------------------------|------------------|----------------------|-------------------|
|     | LDI percentage (%)  |                  |                      |                   | Blob number (pixel <sup>-1</sup> ) |                  |                      |                   |
|     | CTR-<br>All         | CTR-<br>Cortical | CTR-<br>Intermediate | CTR-<br>Scattered | CTR-<br>All                        | CTR-<br>Cortical | CTR-<br>Intermediate | CTR-<br>Scattered |
| 0   | 0.01                | 0.02             | 0.14                 | 0.14              | 0.26                               | 0.19             | 0.99                 | 0.32              |
| 1   | $<10^{-2}$          | 0.02             | 0.14                 | 0.07              | 0.24                               | 0.22             | 0.50                 | 0.68              |
| 2   | $<10^{-2}$          | 0.02             | 0.04                 | 0.04              | 0.38                               | 0.76             | 0.79                 | 0.25              |
| 3   | $<10^{-2}$          | 0.02             | 0.04                 | 0.03              | 0.37                               | 0.03             | 0.57                 | 0.39              |
| 4   | 0.31                | 0.73             | 0.25                 | 0.07              | 0.01                               | 0.02             | 0.07                 | 0.25              |
| 5   | 0.03                | 0.41             | 0.07                 | 0.04              | 0.01                               | 0.02             | 0.07                 | 0.25              |
| 6   | $<10^{-2}$          | 0.02             | 0.04                 | 0.04              | 0.03                               | 0.02             | 0.07                 | 0.79              |
| 7   | 0.31                | 0.90             | 0.57                 | 0.04              | $<10^{-2}$                         | 0.02             | 0.04                 | 0.07              |
| 8   | $<10^{-2}$          | 0.06             | 0.04                 | 0.04              | 0.01                               | 0.02             | 0.07                 | 0.29              |

**Table 6.** Variance of hybrids LDI percentage and blob number in HeLa cells.

| LDI | Variance           |                   |                       |                    |                                                      |                   |                       |                    |
|-----|--------------------|-------------------|-----------------------|--------------------|------------------------------------------------------|-------------------|-----------------------|--------------------|
|     | LDI percentage (%) |                   |                       |                    | Blob number (pixel <sup>-1</sup> ) *10 <sup>-7</sup> |                   |                       |                    |
|     | All<br>(n=10)      | Cortical<br>(n=4) | Intermediate<br>(n=3) | Scattered<br>(n=3) | All<br>(n=10)                                        | Cortical<br>(n=4) | Intermediate<br>(n=3) | Scattered<br>(n=3) |
| 0   | 0.003              | 0.002             | 0.002                 | 0.004              | 0.15                                                 | 0.09              | 0.10                  | 0.17               |
| 1   | 0.01               | 0.002             | 0.01                  | 0.01               | 0.09                                                 | 0.05              | 0.03                  | 0.22               |
| 2   | 0.03               | 0.05              | 0.04                  | 0.03               | 1.23                                                 | 1.94              | 0.24                  | 0.66               |
| 3   | 0.32               | 0.14              | 0.67                  | 0.10               | 11.2                                                 | 3.16              | 14.6                  | 3.02               |
| 4   | 1.44               | 0.89              | 1.02                  | 0.40               | 41.1                                                 | 29.7              | 9.36                  | 16.4               |
| 5   | 1.48               | 0.35              | 2.61                  | 0.50               | 35.4                                                 | 30.9              | 21.3                  | 11.5               |
| 6   | 0.12               | 0.21              | 0.05                  | 0.08               | 7.38                                                 | 6.58              | 10.5                  | 1.88               |
| 7   | 0.76               | 0.75              | 0.67                  | 0.04               | 21.0                                                 | 16.2              | 10.4                  | 9.06               |
| 8   | 15.8               | 9.85              | 21.4                  | 4.94               | 4.42                                                 | 2.17              | 3.19                  | 2.08               |

**Table 7.** Abbreviations.

|             |                                         |
|-------------|-----------------------------------------|
| <b>Ab</b>   | <b>Antibody</b>                         |
| <b>CT</b>   | Computed Tomography                     |
| <b>CTR</b>  | Control                                 |
| <b>CV</b>   | Coefficient of Variation                |
| <b>DMM</b>  | Density Distribution Map                |
| <b>FG</b>   | Foreground                              |
| <b>FN</b>   | False Negative                          |
| <b>FNR</b>  | False Negative Rate                     |
| <b>FP</b>   | False Positive                          |
| <b>GUI</b>  | Graphical User Interface                |
| <b>LDI</b>  | Local Density Index                     |
| <b>MAD</b>  | Median Absolute Deviation               |
| <b>MIP</b>  | Maximum Intensity Projection            |
| <b>MT</b>   | Microtubule                             |
| <b>NCC</b>  | Normalized Cross Correlation            |
| <b>PTX</b>  | Paclitaxel                              |
| <b>SDR</b>  | Stoichiometric Detection Rate           |
| <b>SE</b>   | Structuring Element                     |
| <b>SMLM</b> | Single-Molecule Localization Microscopy |
| <b>TN</b>   | True Negative                           |
| <b>TP</b>   | True Positive                           |
| <b>TPR</b>  | True Positive Rate                      |
| <b>V2R</b>  | Vasopressin Receptor 2                  |
